# Supplementary material
Source: PubMed Central journal article supplement (PMC4083118)

**Suppl Figure S1**

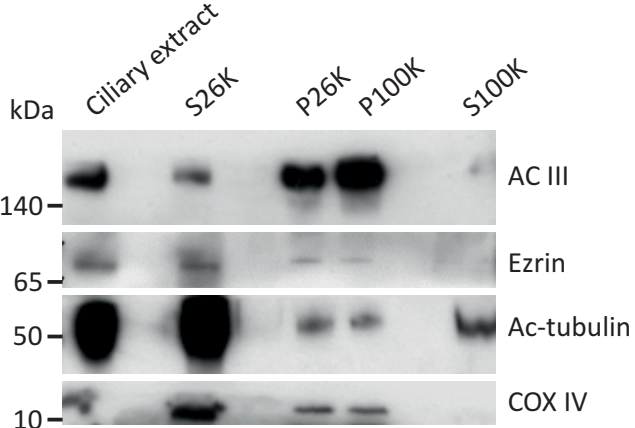

Supplement: supp_M113.035378_mcp.M113.035378-2.pdf [file supp_M113.035378_mcp.M113.035378-2.pdf]
