# Supplementary material
Source: PubMed Central journal article supplement (PMC4083118)

# Suppl Figure S2

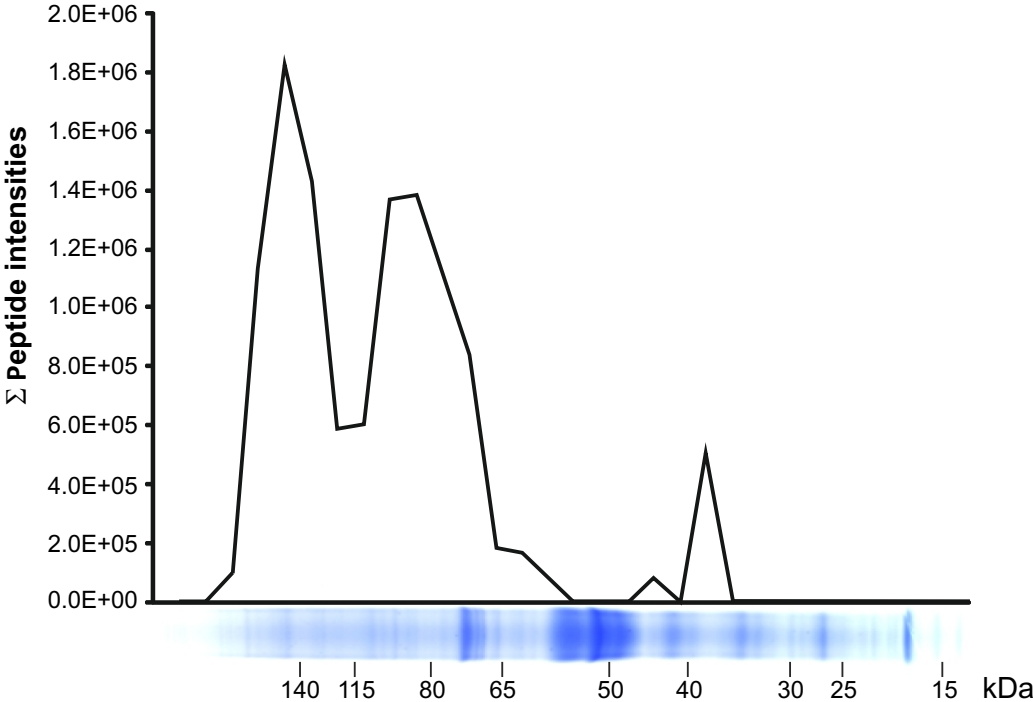

Supplement: supp_M113.035378_mcp.M113.035378-3.pdf [file supp_M113.035378_mcp.M113.035378-3.pdf]
